# Supplementary material for: Phthalate levels in Norwegian indoor air related to particle size fraction
Source: Royal Society of Chemistry journal article supplement (doi:10.1039/b709947a), 2007-01-01
Supplement: b709947a.pdf [file b709947a.pdf]

**Table 4:** Quartz parameter temperature program

| Mode 1        | Carrier gas                | Temperature (°C) | Time (s) |
|---------------|----------------------------|------------------|----------|
| Step 1        | 100 % He                   | 220              | 60       |
| Step 2        | 100 % He                   | 360              | 60       |
| Step 3        | 100 % He                   | 525              | 60       |
| Step 4        | 100 % He                   | 850              | 90       |
| <b>Mode 2</b> |                            |                  |          |
| Step 1        | 98 % He/2 % O <sub>2</sub> | 550              | 30       |
| Step 2        | 98 % He/2 % O <sub>2</sub> | 650              | 30       |
| Step 3        | 98 % He/2 % O <sub>2</sub> | 720              | 30       |
| Step 4        | 98 % He/2 % O <sub>2</sub> | 790              | 40       |
| Step 5        | 98 % He/2 % O <sub>2</sub> | 820              | 30       |
| Step 6        | 98 % He/2 % O <sub>2</sub> | 860              | 20       |
| Step 7        | 98 % He/2 % O <sub>2</sub> | 890              | 40       |

**Table 5.** Analytical data of the HPLC/HRMS method

| Compound             | Elemental composition                                         | MW*      | Monitoring Ion*[M+H] | Retention Time<br>minutes | Qualifyin g<br>ion 1*<br>[C <sub>8</sub> H <sub>5</sub> O <sub>3</sub> ] <sup>+</sup> | Qualifying ion 2*<br>[C <sub>10</sub> H <sub>8</sub> NO <sub>3</sub> ] <sup>+</sup> | Precicion <sup>+</sup><br>RSD % | Instrumental<br>LOD<br>pg/injected | Meth.**1<br>LOD<br>ng/m3 |
|----------------------|---------------------------------------------------------------|----------|----------------------|---------------------------|---------------------------------------------------------------------------------------|-------------------------------------------------------------------------------------|---------------------------------|------------------------------------|--------------------------|
| DBP                  | C <sub>16</sub> H <sub>22</sub> O <sub>4</sub>                | 278.1518 | 279.1596             | 12.3                      | 149.0239                                                                              | 190.0504                                                                            | 14                              | 12                                 | 0.04                     |
| BBP                  | C <sub>19</sub> H <sub>20</sub> O <sub>4</sub>                | 312.1362 | 313.1440             | 11.9                      | very weak                                                                             | 190.0504                                                                            | 13                              | 34                                 | 0.09                     |
| DChP                 | C <sub>20</sub> H <sub>26</sub> O <sub>4</sub>                | 330.1831 | 331.1909             | 14.1                      | 149.0239                                                                              | 190.0504                                                                            | 18                              | 30                                 | 0.09                     |
| DEHP                 | C <sub>24</sub> H <sub>38</sub> O <sub>4</sub>                | 390.2770 | 391.2848             | 17.0                      | 149.0239                                                                              | 190.0504                                                                            | 17                              | 76                                 | 0.2                      |
| d <sub>4</sub> -DBP  | C <sub>16</sub> D <sub>4</sub> H <sub>18</sub> O <sub>4</sub> | 282.1831 | 283.1909             | 12.3                      | 153.0552                                                                              | 194.0817                                                                            | 15                              | 12                                 | 0.04                     |
| d <sub>4</sub> -DnOP | C <sub>24</sub> D <sub>4</sub> H <sub>34</sub> O <sub>4</sub> | 394.3083 | 395.3161             | 17.5                      | 153.0552                                                                              | 194.0817                                                                            | 18                              | 76                                 | 0.2                      |

\* : Monoisotopic mass

\*\* : 47mm filter, 100 m<sup>3</sup> total volume, signal-to-noise ration 3/1.+ : Based on standard injections during a 48 hours sequence, *n* = 9.

**Table 6.** Mass concentrations of elemental carbon, organic carbon, total carbon and organic matter (concentrations are shown in  $\mu\text{g}/\text{m}^3$ ).

| Site                                    | EC <sub>PM10</sub> | EC <sub>PM2.5</sub> | OC <sub>PM10</sub> | OC <sub>PM2.5</sub> | TC <sub>PM10</sub> | TC <sub>PM2.5</sub> | OM <sub>PM10</sub> | OM <sub>PM2.5</sub> |
|-----------------------------------------|--------------------|---------------------|--------------------|---------------------|--------------------|---------------------|--------------------|---------------------|
| Oslo University College (corridor)      | 1.1                | 1.0                 | 3.2                | 1.6                 | 4.3                | 2.5                 | 5.1                | 2.5                 |
| Oslo University College (office)        | 1.3                | 0.6                 | 4.3                | 2.2                 | 5.6                | 2.8                 | 6.9                | 3.5                 |
| Oslo University College (stairway)      | 0.7                | 0.7                 | 3.8                | 2.8                 | 4.5                | 3.5                 | 6.1                | 4.5                 |
| Oslo University College (computer room) | 0.4                | 0.4                 | 2.9                | 2.3                 | 3.3                | 2.6                 | 4.7                | 3.6                 |
| Oslo University College (hall)          | 1.2                | 1.1                 | 3.5                | 2.3                 | 4.6                | 3.4                 | 5.6                | 3.7                 |
| Primary school, Lysejordet (corridor)   | 0.5                | 0.4                 | 7.9                | 2.2                 | 8.4                | 2.6                 | 13                 | 3.5                 |
| Primary school, Lysejordet (playroom)   | 0.3                | 0.2                 | 13                 | 2.9                 | 14                 | 3.1                 | 21                 | 4.6                 |
| Primary school, Smestad (corridor)      | 1.0                | 0.6                 | 18                 | 3.8                 | 19                 | 4.4                 | 28                 | 6.0                 |
| Primary school, Smestad (library)       | 0.4                | 0.4                 | 1.3                | 1.1                 | 1.7                | 1.4                 | 2.1                | 1.7                 |
| Kindergarten, Vestjordet                | 1.1                | 0.9                 | 5.8                | 3.3                 | 6.9                | 4.1                 | 9.3                | 5.2                 |
| Kindergarten, Grefsen                   | 0.5                | 0.4                 | 4.4                | 2.4                 | 4.9                | 2.8                 | 7.1                | 3.8                 |
| Kindergarten, Lindern                   | 1.1                | 1.5                 | 6.5                | 5.8                 | 7.6                | 7.3                 | 10                 | 9.3                 |
| Dwelling, Lysejordet (children's room)  | 0.7                | 0.6                 | 9.2                | 5.1                 | 9.9                | 5.7                 | 15                 | 8.1                 |
| Dwelling, Korsvoll (sitting-room)       | 1.0                | 0.8                 | 4.7                | 2.4                 | 5.7                | 3.2                 | 7.5                | 3.8                 |
| <b>Mean</b>                             | 0.8                | 0.7                 | 6.3                | 2.9                 | 7.1                | 3.5                 | 10                 | 4.6                 |
| <b>Min</b>                              | 0.3                | 0.2                 | 1.3                | 1.1                 | 1.7                | 1.4                 | 2.1                | 1.7                 |
| <b>Max</b>                              | 1.3                | 1.5                 | 18                 | 5.8                 | 19                 | 7.3                 | 28                 | 9.3                 |

PM<sub>10</sub>: particulate matter with an equivalent aerodynamic diameter  $\leq 10 \mu\text{m}$ , PM<sub>2.5</sub>: particulate matter with an equivalent aerodynamic diameter  $\leq 2.5 \mu\text{m}$ , EC: elemental carbon, OC: organic carbon, TC: total carbon (TC = EC + OC), OM: organic matter (OM = OC x 1.6).

**Table 7.** Relative contribution of phthalates in different size fractions to organic matter.

Shares are given in percent.

| Site                    | (Phthalate/OM <sub>PM10</sub> ) | (Phthalate/OM <sub>PM2.5</sub> ) |
|-------------------------|---------------------------------|----------------------------------|
| Oslo University College |                                 |                                  |
| (corridor)              | 0.9                             | ND                               |
| Oslo University College |                                 |                                  |
| (office)                | 2.2                             | ND                               |
| Oslo University College |                                 |                                  |
| (stairway)              | 1.6                             | ND                               |
| Oslo University College |                                 |                                  |
| (computer room)         | 4.6                             | ND                               |
| Oslo University College |                                 |                                  |
| (hall)                  | 1.5                             | 1.6                              |
| Primary school,         |                                 |                                  |
| Lysejordet (corridor)   | 3.2                             | 3.4                              |
| Primary school,         |                                 |                                  |
| Lysejordet (playroom)   | 0.7                             | 0.7                              |
| Primary school,         |                                 |                                  |
| Smestad (corridor)      | 1.1                             | 1.9                              |
| Primary school,         |                                 |                                  |
| Smestad (library)       | 1.2                             | 1.2                              |
| Kindergarten,           |                                 |                                  |
| Vestjordet              | 1.3                             | 0.9                              |
| Kindergarten,           |                                 |                                  |
| Grefsen                 | 4.7                             | 3.7                              |
| Kindergarten,           |                                 |                                  |
| Lindern                 | 0.7                             | 0.4                              |

---

|                      |     |     |
|----------------------|-----|-----|
| Dwelling, Lysejordet |     |     |
| (children's room)    | 1.5 | 1.8 |
| Dwelling, Korsvoll   |     |     |
| (sitting-room)       | 1.6 | 1.8 |
| <hr/>                |     |     |
| Mean                 | 1.9 | 1.7 |
| Min                  | 0.7 | 0.4 |
| Max                  | 4.7 | 3.7 |

---

ND: Not determined
